# Supplementary material for: Thermo-Optical Characterization of Therminol55 Based MXene–Al2O3 Hybridized Nanofluid and New Correlations for Thermal Properties
Source: MDPI journal article supplement (doi:10.3390/nano12111862), 2022-05-30
Supplement: s1 [file s1]

# Supplementary Materials

## Thermo-Optical Characterization of Therminol55 Based MXene–Al<sub>2</sub>O<sub>3</sub> Hybridized Nanofluid and New Correlations for Thermal Properties

Likhan Das <sup>1</sup>, Khairul Habib <sup>1,\*</sup>, Kashif Irshad <sup>2,3,\*</sup>, Rahman Saidur <sup>4</sup>, Salem Algarni <sup>5</sup> and Talal Alqahtani <sup>5</sup>

<sup>1</sup> Department of Mechanical Engineering, Universiti Teknologi PETRONAS32610 Seri Iskandar, Perak Darul Ridzuan, Malaysia; likhan.das11@gmail.com

<sup>2</sup> Interdisciplinary Research Center for Renewable Energy and Power Systems (IRC-REPS), King Fahd University of Petroleum & Minerals, Dhahran 31261, Saudi Arabia

<sup>3</sup> Researcher at K.A.CARE Energy Research & Innovation Center at Dhahran, Dhahran 31261, Saudi Arabia

<sup>4</sup> Research Centre for Nanomaterials and Energy Technology (RCNMET), School of Engineering and Technology, Sunway University, Petaling Jaya 47500, Malaysia; saidur@sunway.edu.my

<sup>5</sup> Department of Mechanical Engineering, King Khalid University, P.O. Box 9004, Abha 61413, Saudi Arabia; saalgarni@kku.edu.sa (S.A.); talqahtani@kku.edu.sa (T.A.)

\* Correspondence: khairul.habib@utp.edu.my (K.H.); kashif.irshad@kfupm.edu.sa (K.I.); Tel.: +966-547854711(K.I.)

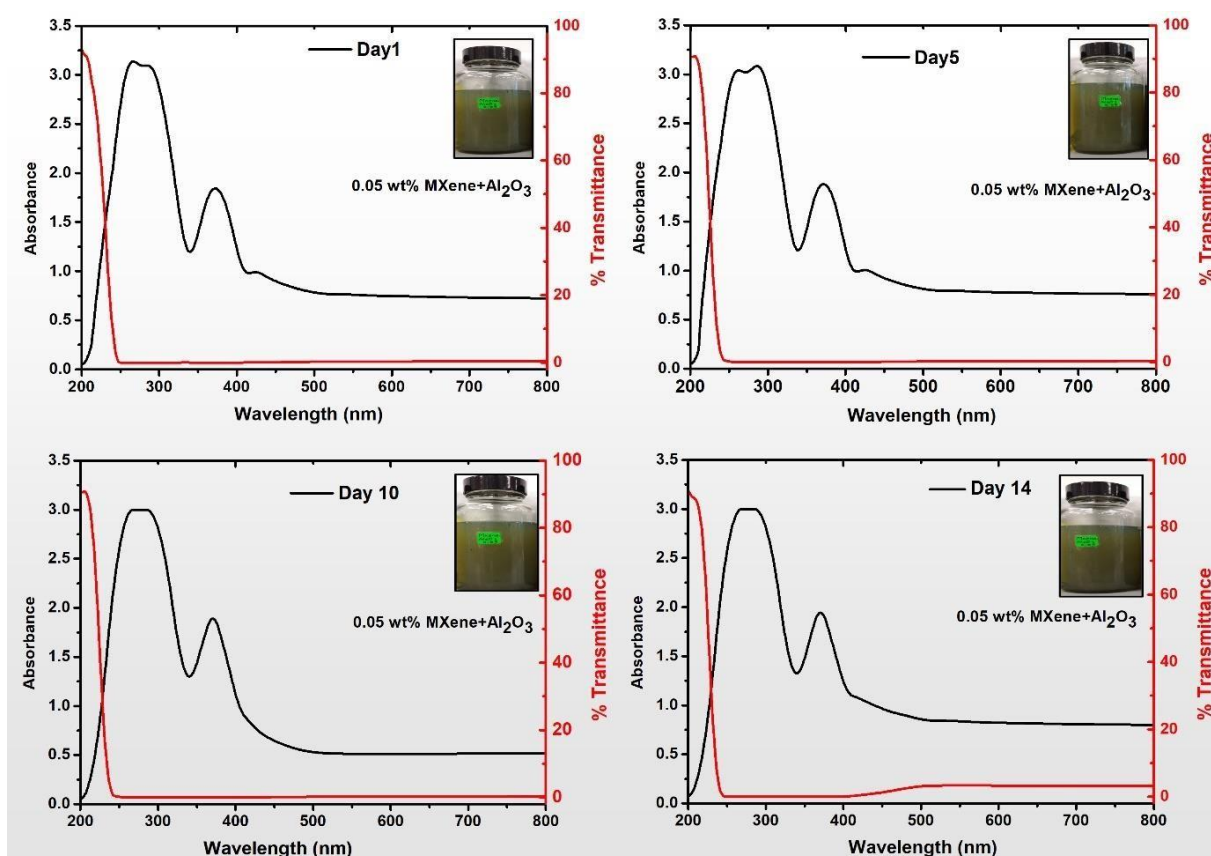

**Figure S1.** Absorbance and transmittance spectra of TH55/MXene+Al<sub>2</sub>O<sub>3</sub> nanofluids as a function of wavelength from day 1 to day 14 for 0.05 wt% of MXene+Al<sub>2</sub>O<sub>3</sub>.

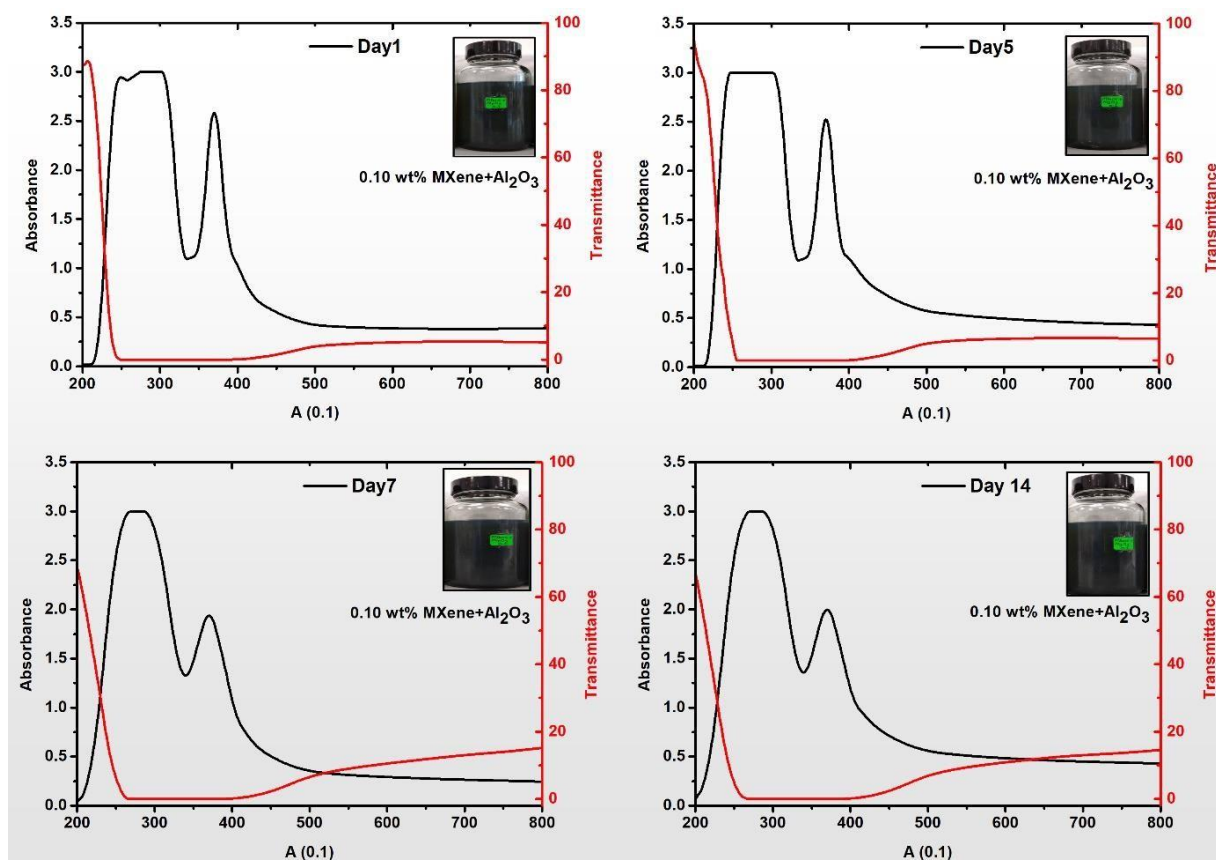

**Figure S2.** Absorbance and transmittance spectra of TH55/MXene+Al<sub>2</sub>O<sub>3</sub> nanofluids as a function of wavelength from day 1 to day 14 for 0.10 wt% of MXene+Al<sub>2</sub>O<sub>3</sub>.

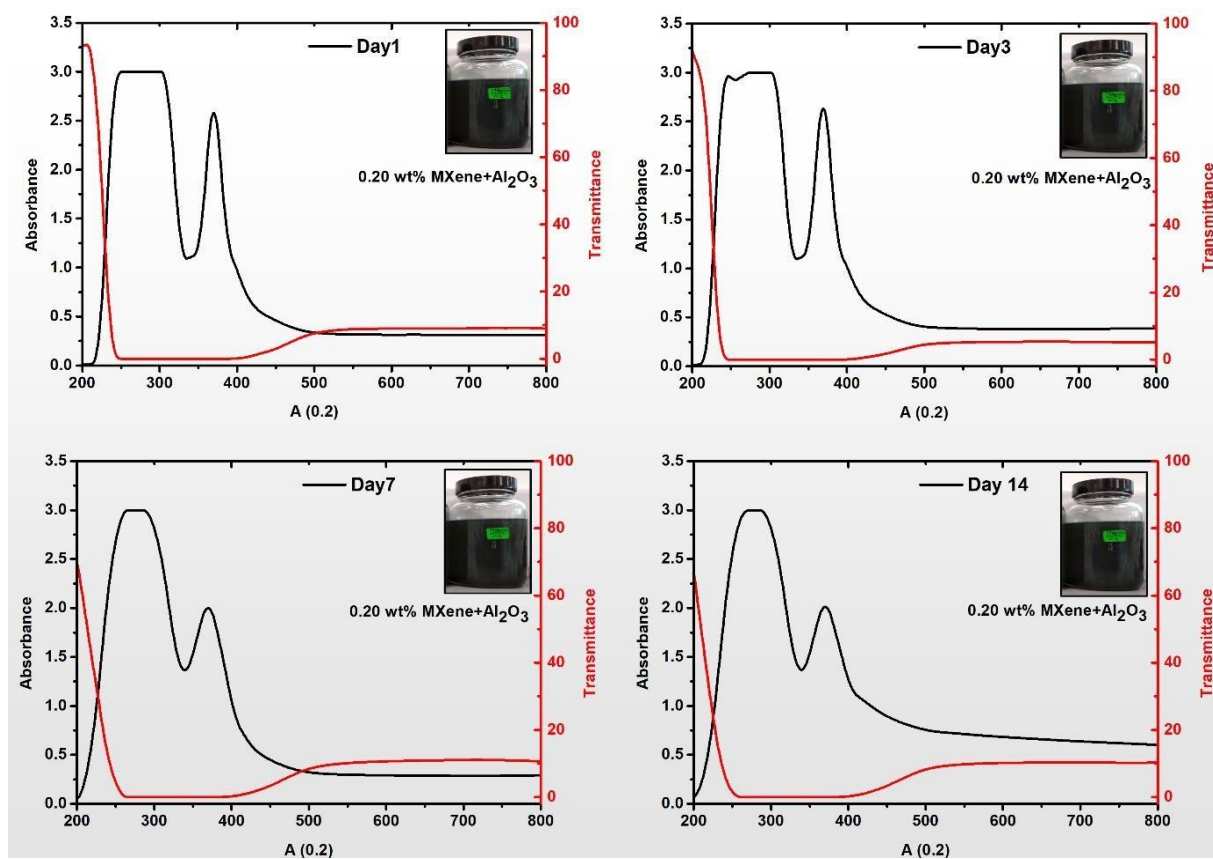

**Figure S3.** Absorbance and transmittance spectra of TH55/MXene+Al<sub>2</sub>O<sub>3</sub> nanofluids as a function of wavelength from day 1 to day 14 for 0.20 wt% of MXene+Al<sub>2</sub>O<sub>3</sub>.
